# Supplementary material for: A high-throughput chemically induced inflammation assay in zebrafish
Source: PubMed Central journal article supplement (PMC3022775; doi:10.1186/1741-7007-8-151), 2010-12-22

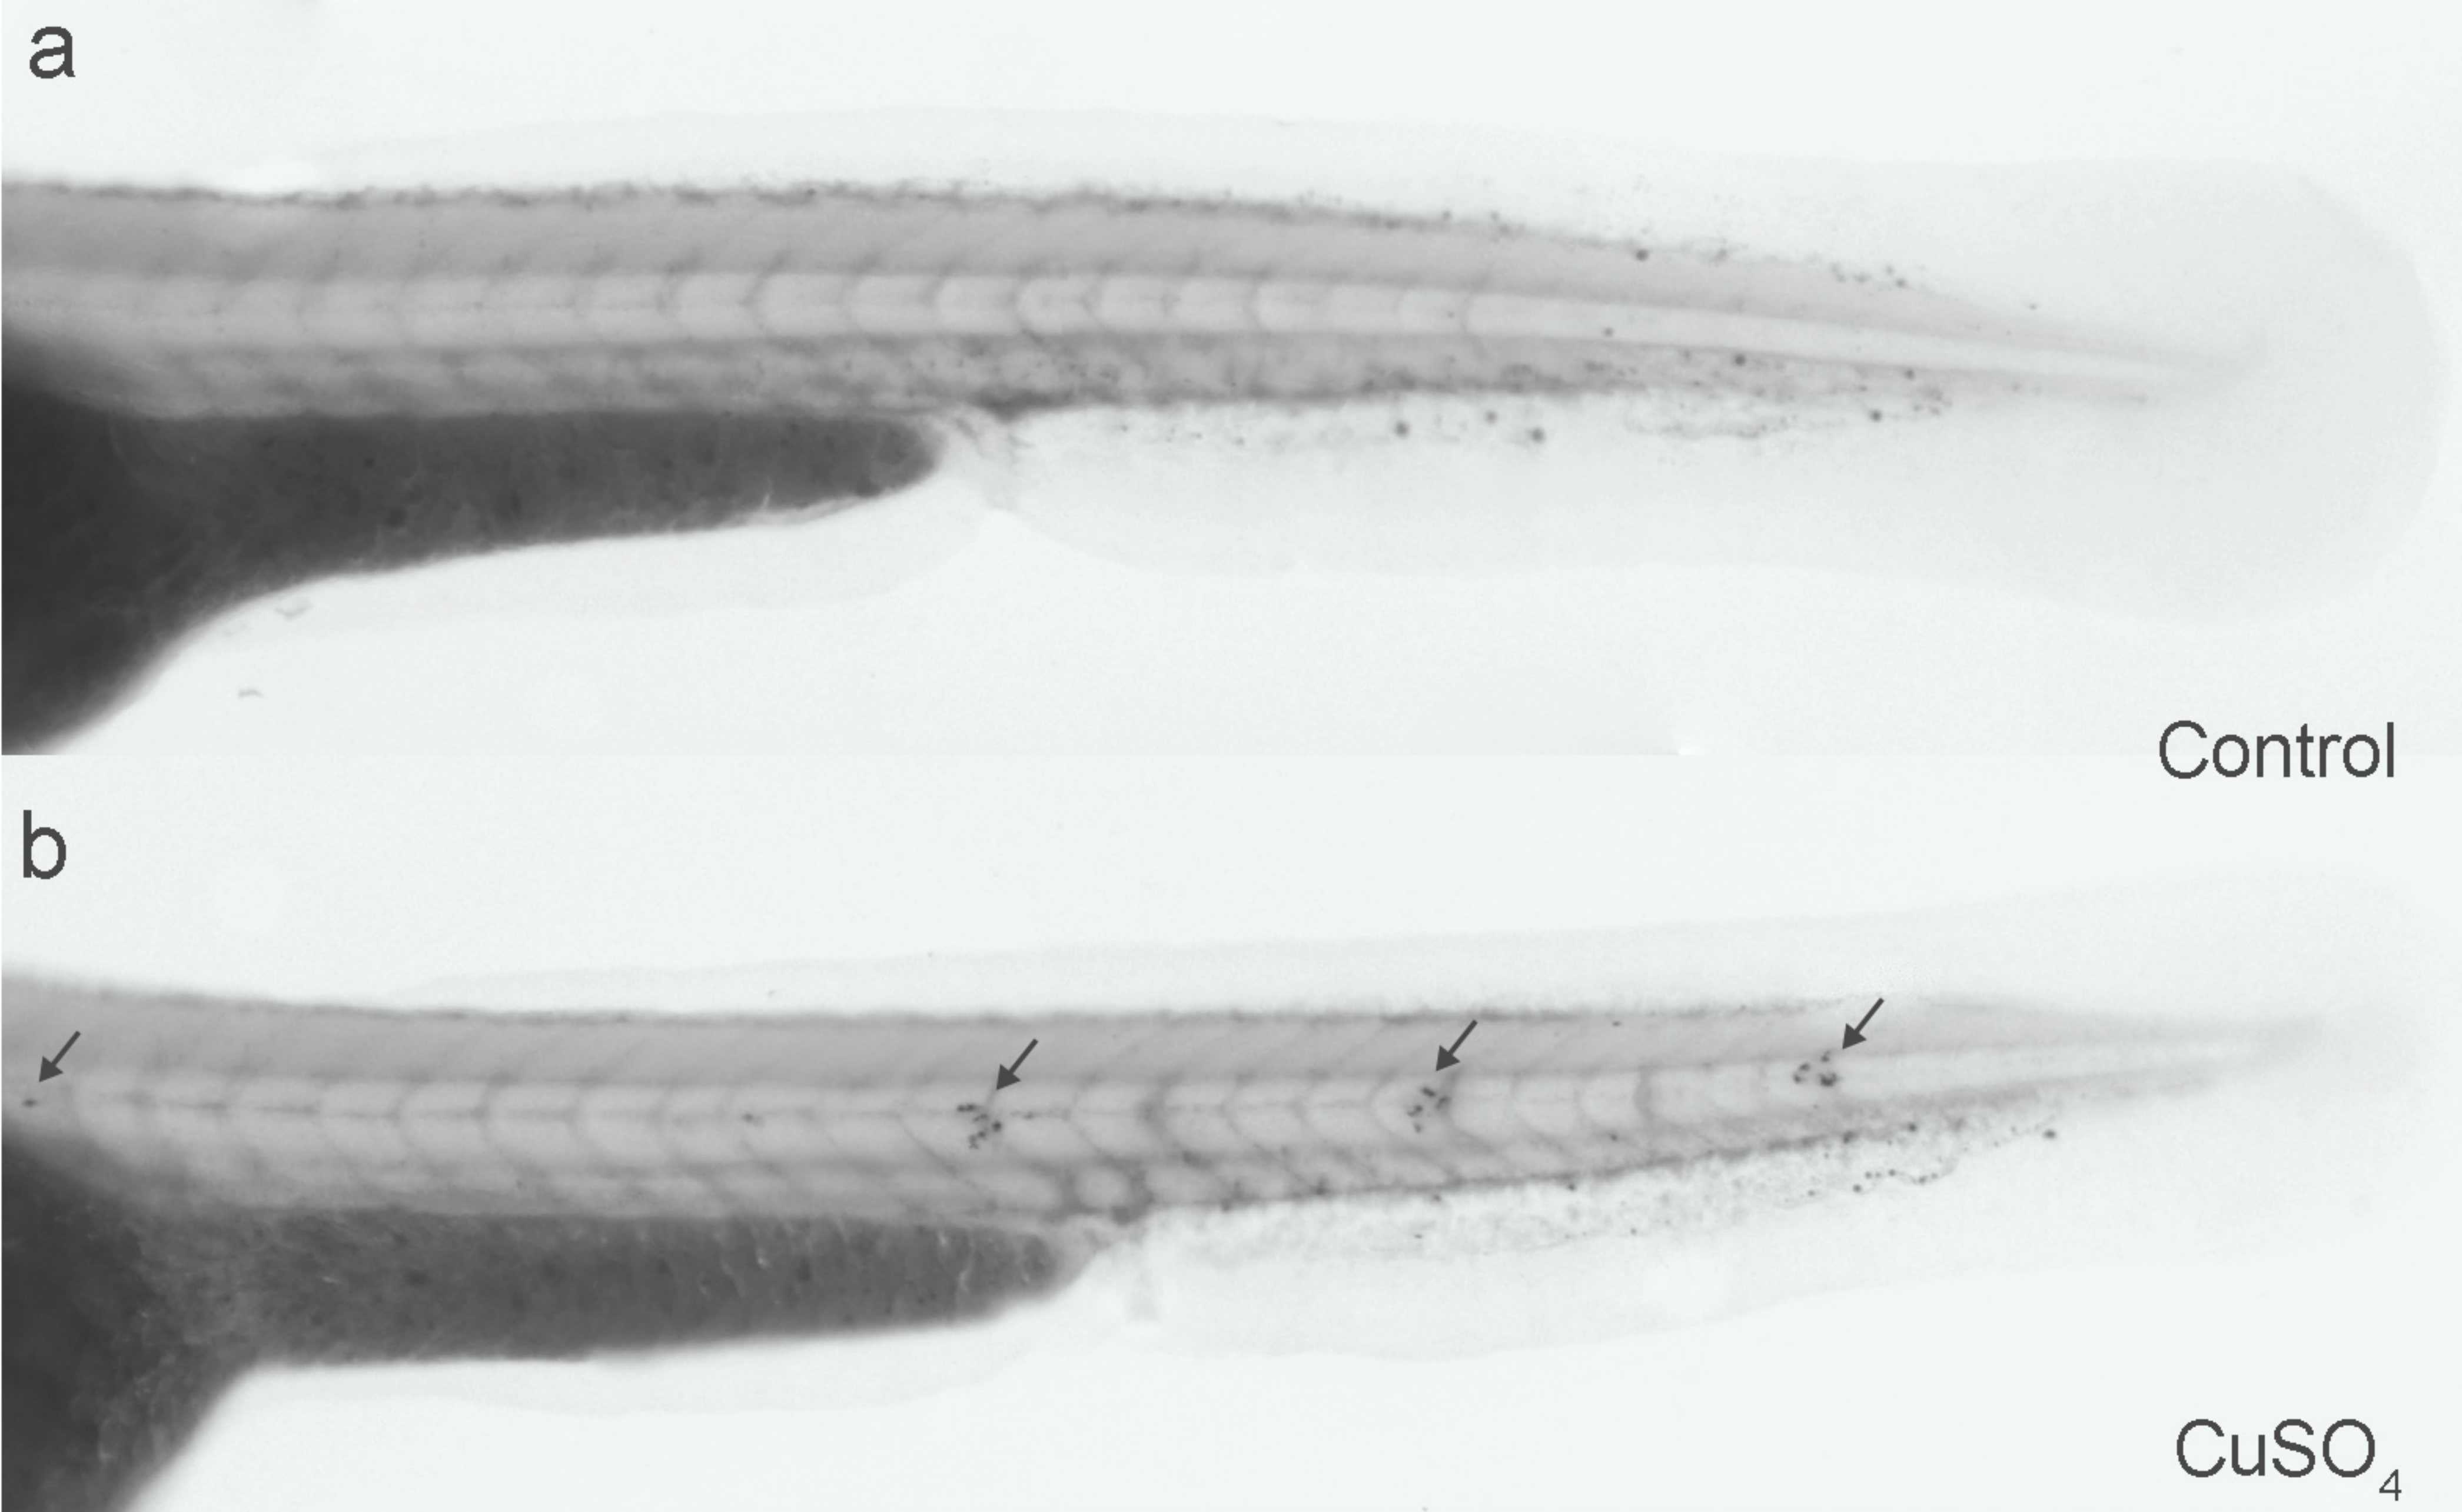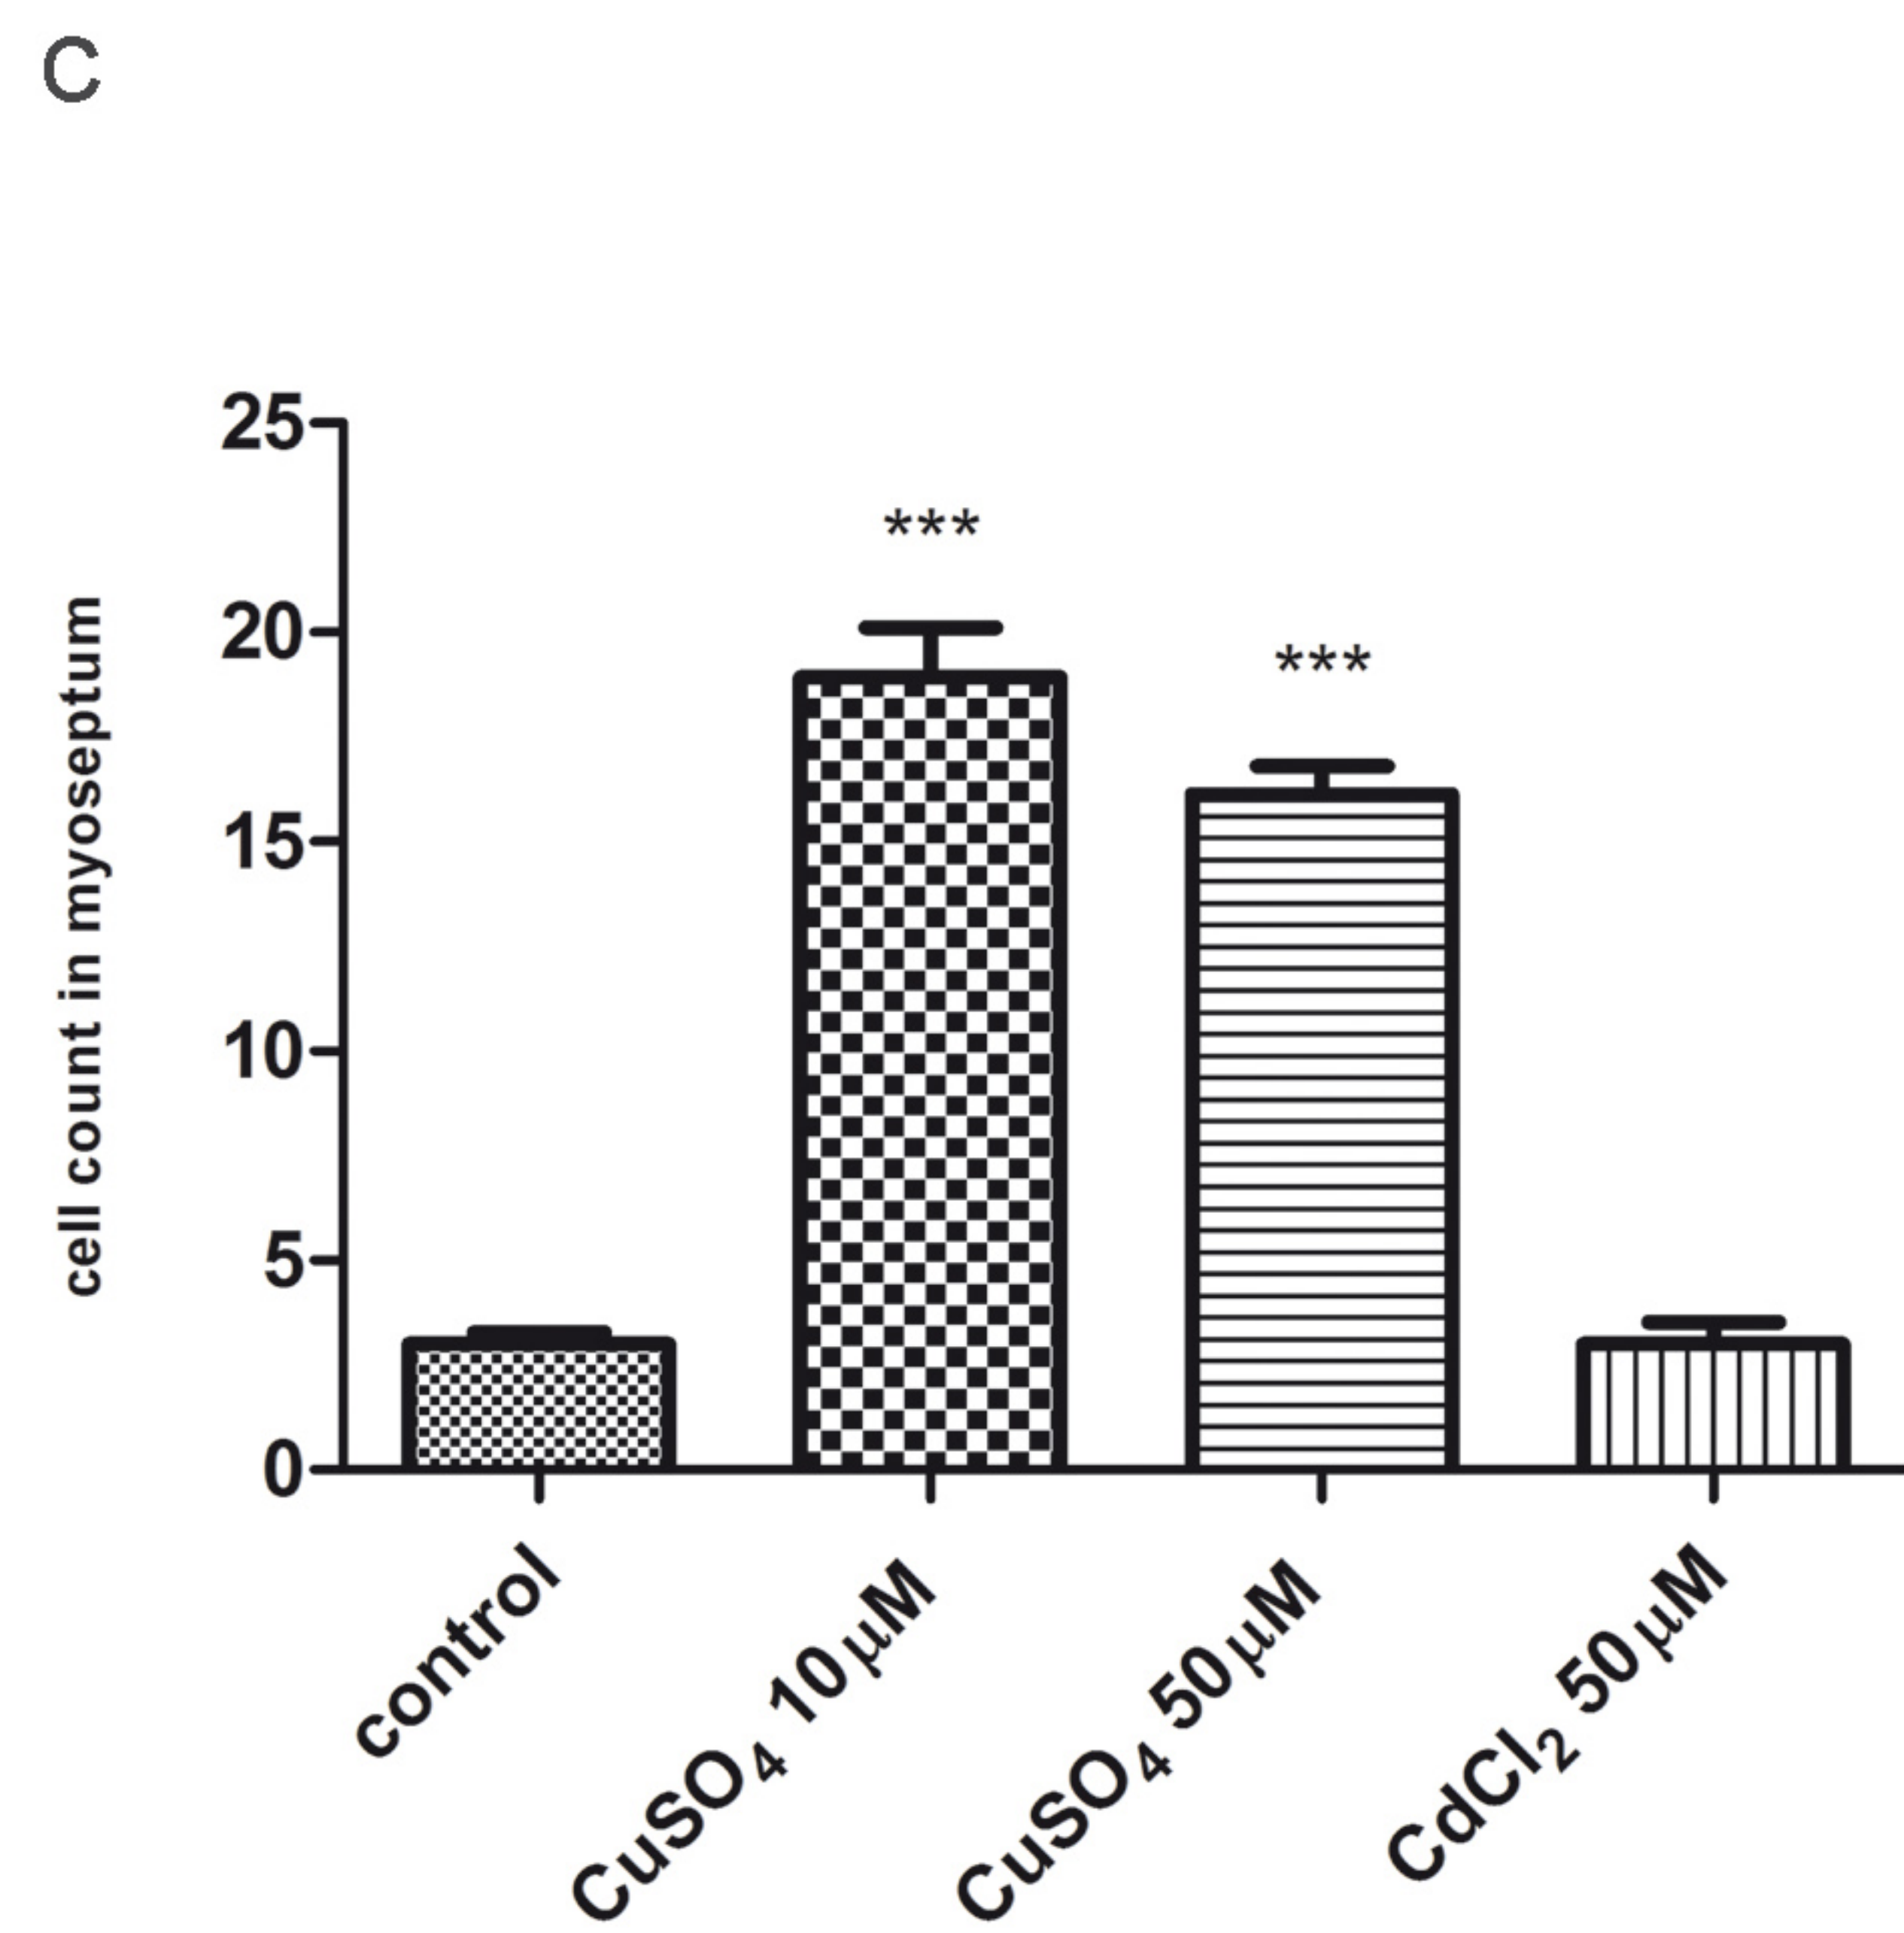

Supplement: 1741-7007-8-151-S6.pdf [file 1741-7007-8-151-S6.pdf]
